# Supplementary material for: Transdermal Drug Delivery in the Pig Skin
Source: MDPI journal article supplement (doi:10.3390/pharmaceutics13122016), 2021-11-26
Supplement: s1 [file s1]

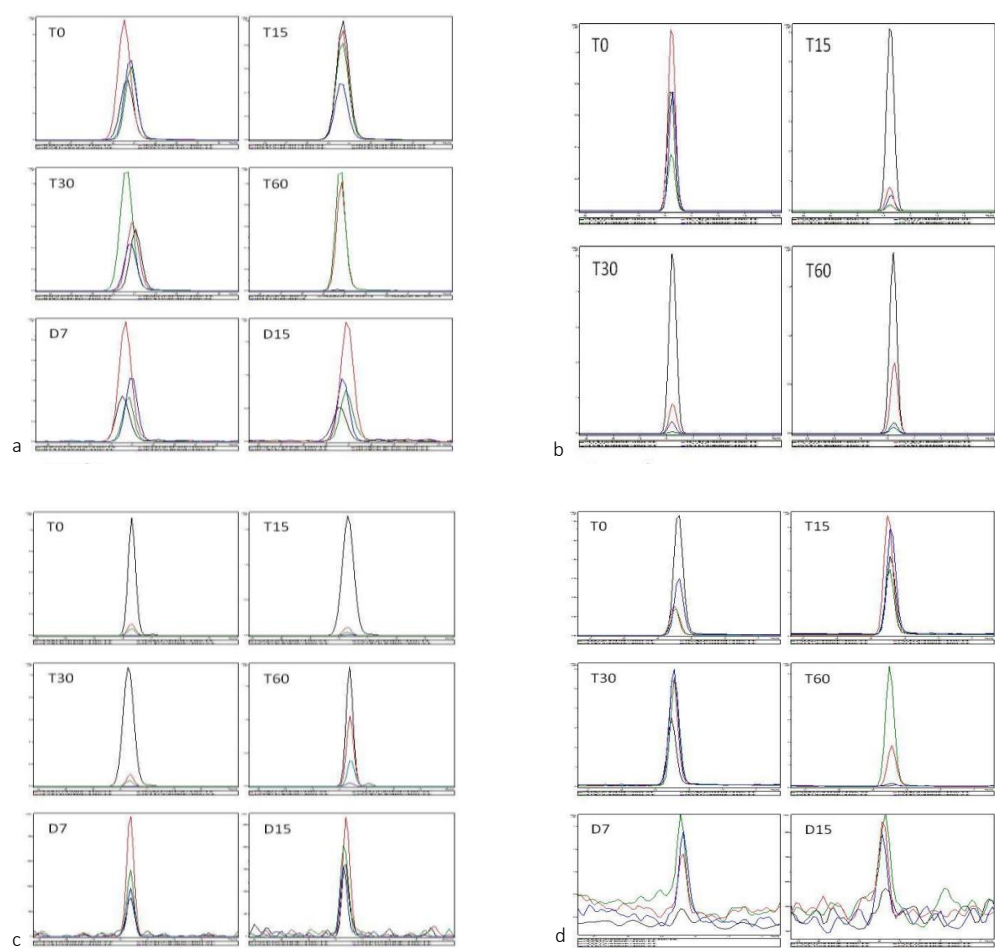

Supplementary Figure S1: HPLC curves for procaine (a), ketoprofen (b), biotin (c) and caffeine (d).

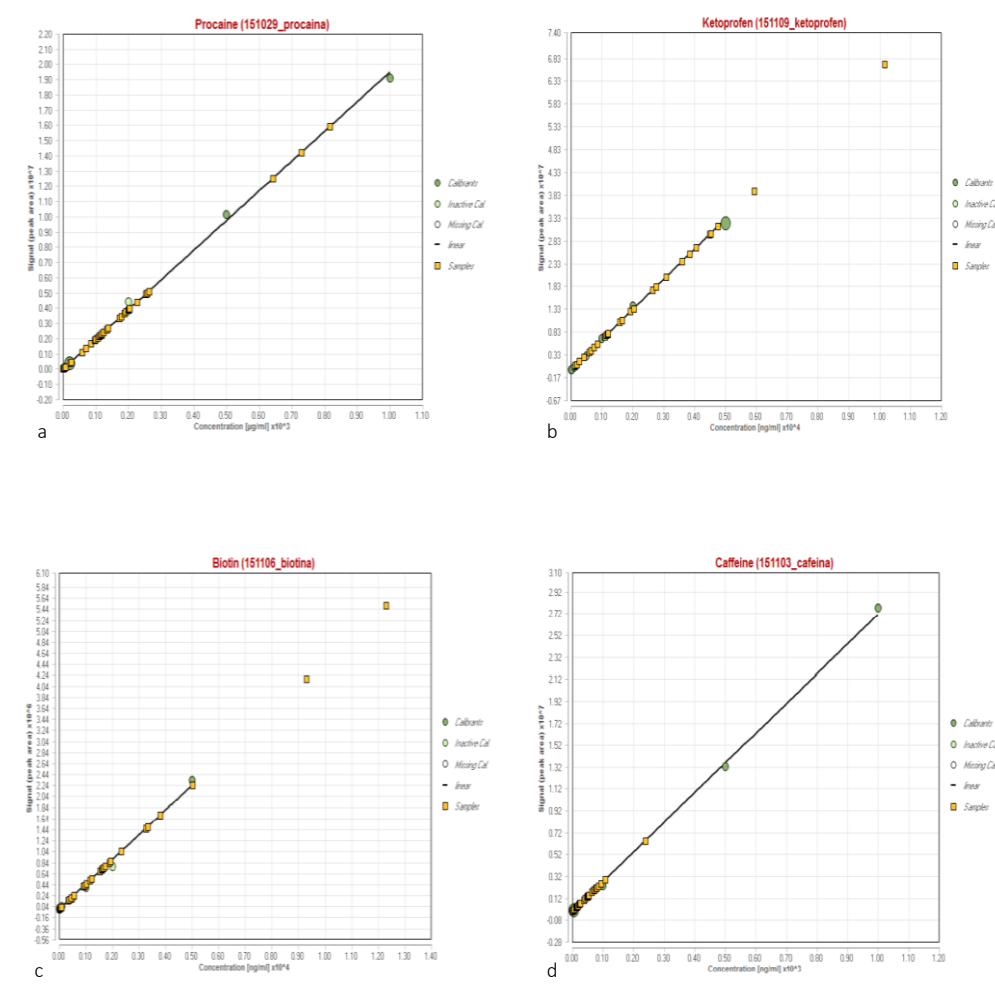

Supplementary Figure S2: calibration values for procaine (a), ketoprofen (b), biotin (c) and caffeine (d).
